# Supplementary material
Source: MDPI journal article supplement (https://www.mdpi.com/2073-4433/7/12/158)
Supplement: s1 [file s1]

## Sheet: Table S1
Table S1 Summary of total 103 epidemiological studies included with searching conditions for health effects of desert dust
Region	NO.	Reference	Location & Study period	Age group	Outcome	Identification of dust days	PM fraction	Causes	% Risk per 10 μg/m3(95% CI) p-value% for dust days
Europe	1	Samoli E, Kougea E, Kassomenos P, et al. Does the presence of desert dust modify the effect of PM< sub> 10</sub> on mortality in Athens, Greece?[J]. Science of the Total Environment, 2011, 409(11): 2049-2054.	Athens, Greece，2001-2006	All ages	Mortality	AOD，BTA	PM10	TotM	-0.1（-0.6，0.4）
Europe		↑		Age>75				CVD	0.2（-0.4，0.9）
Europe		↑						RES	0.2（-0.5，2.7）
Europe	2	Samoli E, Nastos PT, Paliatsos AG, Katsouyanni K, Priftis KN (2011a) Acute effects of air pollution on pediatric asthma exacerbation: evidence of association and effect modification. Environ Res 111:418–424	Athens, Greece，2001-2004		Morbidity		PM10	Asthma
Europe	3	Nastos P T, Kampanis N A, Giaouzaki K N, et al. Environmental impacts on human health during a Saharan dust episode at Crete Island, Greece[J]. Meteorologische Zeitschrift, 2011, 20(5): 517-529.	Crete Island, Greece, 2004		Morbidity		PM10	RES-MORD
Europe	4	Tobías A, Pérez L, Díaz J, et al. Short-term effects of particulate matter on total mortality during Saharan dust outbreaks: A case-crossover analysis in Madrid (Spain)[J]. Science of the Total Environment, 2011, 412: 386-389.	Madrid，Spain	All ages	Mortality	BTA	PM2.5	TotM	2.9（-1.1，6.9）
Europe		↑					PM2.5-10	TotM	2.8（0.1，5.8）
Europe	5	Díaz J, Tobías A, Linares C. Saharan dust and association between particulate matter and case-specific mortality: a case-crossover analysis in Madrid (Spain)[J]. Environ Health, 2012, 11(1): 11.	Madrid，Spain		Mortality		PM10	organic causes	1.70（0.79，2.62）
Europe		↑						RES	3.48（1.22，5.79）
Europe		↑						Circulatory	1.95(0.29,3.64)
Europe		↑						Cerebrovascular	0.46(-2.93,3.96)
Europe	6	Jiménez E, Linares C, Martínez D, et al. Role of Saharan dust in the relationship between particulate matter and short-term daily mortality among the elderly in Madrid (Spain)[J]. Science of the total environment, 2010, 408(23): 5729-5736.	Madrid，Spain	Age〉75	Mortality		PM2.5	TotM	No statistical significant effects
Europe		↑						RES	No statistical significant effects
Europe		↑						CIRC	No statistical significant effects
Europe		↑					PM10	TotM	2.7(1.4,4.1)
Europe		↑						RES	4.0(1.7,6.3)
Europe		↑						CIRC	3.5(0.9,6.1)
Europe	7	Maté T, Guaita R, Pichiule M, et al. Short-term effect of fine particulate matter (PM< sub> 2.5</sub>) on daily mortality due to diseases of the circulatory system in Madrid (Spain)[J]. Science of the total environment, 2010, 408(23): 5750-5757.	Madrid，Spain, 2003-2005		Mortality		PM2.5	CIRC	2.5(0.7,4.5)
Europe		↑						Acute myocardial infarction	6.2(3.2,10.0)
Europe	8	Reyes M, Díaz J, Tobias A, et al. Impact of Saharan dust particles on hospital admissions in Madrid (Spain)[J]. International journal of environmental health research, 2013 (ahead-of-print): 1-10.	Madrid，Spain	All ages	Morbidity		PM10	RES	2.0(-0.2,4.2)
Europe		↑					PM2.5	TotM
Europe		↑						RES
Europe		↑						CIRC
Europe	9	Perez L, Tobías A, Querol X, et al. Saharan dust, particulate matter and cause-specific mortality: A case–crossover study in Barcelona (Spain)[J]. Environment international, 2012, 48: 150-155.	Barcelona, Spain	All ages	Mortality	BTA	PM2.5-10	CAR	10.32(3.09,17.98)
Europe		↑						CER	8.62(4.36,23.30)
Europe		↑						RES	3.51(-8.19,16.60)
Europe		↑					PM2.5-1	CAR	13.29(2.57,24.71)
Europe		↑						CER	0.29(18.43,21.86)
Europe		↑						RES	15.71(-2.43,36.29)
Europe		↑					PM1	CAR	4.14(-3.22,12.07)
Europe		↑						CER	5.29(-8.16,20.46)
Europe		↑						RES	1.95(-9.20,14.37)
Europe	10	Perez L, Tobias A, Querol X, et al. Coarse particles from Saharan dust and daily mortality[J]. Epidemiology, 2008, 19(6): 800-807.	Barcelona, Spain, 2003-2004	All ages	Mortality	BTA	PM2.5-10	TotM	8.4（1.5，15.8）
Europe		↑		Age>75			PM2.5	TotM	5.0（0.5，9.7）
Europe	11	Tobías A, Caylà J A, Pey J, et al. Are Saharan dust intrusions increasing the risk of meningococcal meningitis?[J]. International Journal of Infectious Diseases, 2011, 15(7): e503.	Barcelona, Spain, 2002-2009		Morbidity	BTA，Dust model，Satellite	PM10	Meningitis	1.392（1.152-1.681）
Europe	12	Dadvand P, Basagaña X, Figueras F, et al. Saharan dust episodes and pregnancy[J]. Journal of Environmental Monitoring, 2011, 13(11): 3222-3228.	Barcelona, Spain, 2003-2005		Morbidity		PM10	Pregnance	+0.5 days
Europe	13	Mallone S, Stafoggia M, Faustini A, et al. Saharan dust and associations between particulate matter and daily mortality in Rome, Italy[J]. Environmental health perspectives, 2011, 119(10): 1409.	Roma, Italy, 2001-2004	Age〉35	Mortality	Lidar obserbations,PM10/NO2>0.6	PM10	TotM	3.0(0.0,6.0)
Europe		↑						CAR	8.9(3.5,14.5)
Europe		↑						CER	1.6(-4.7,8.4)
Europe		↑						CIRC	5.5(0.9,10.2)
Europe		↑						RESP	2.5(-11.9,19.3)
Europe		↑					PM2.5-10	TotM	1.1(-0.6,2.7)
Europe		↑						CAR	4.9(2.2,7.8)
Europe		↑						CER	3.5(0.6,6.7)
Europe		↑						CIRC	4.0(1.6,6.5)
Europe		↑						RESP	9.8(0.2,21.3)
Europe		↑					PM2.5	TotM	2.5(-0.9,6.1)
Europe		↑						CAR	1.1(-4.6,7.2)
Europe		↑						CER	-2.5(-9.1,4.8)
Europe		↑						CIRC	-0.7(-5.5,4.4)
Europe		↑						RESP	6.6(-10,27)
Europe	14	Sajani S Z, Miglio R, Bonasoni P, et al. Saharan dust and daily mortality in Emilia-Romagna (Italy)[J]. Occupational and environmental medicine, 2011, 68(6): 446-451.	Emilia-Romagna, Italy, 2002-2006	All ages	Mortality	BTA	PM10	TotM	0.0（-3.5，3.6）
Europe		↑						CVD	-0.8（-5.9，4.6）
Europe		↑						RES	-0.2（-10.8，11.5）
Europe	15	Alessandrini E R, Stafoggia M, Faustini A, et al. Saharan dust and the association between particulate matter and daily hospitalisations in Rome, Italy[J]. Occupational and environmental medicine, 2013, 70(6): 432-434.	Roma, Italy, 2001-2004	All ages	Morbidity		PM10	CAR	1.67(0.63,4.07)
Europe		↑						CER	2.55(0.20,5.01)
Europe		↑						RES	2.22(-1.89,6.68)
Europe		↑					PM2.5-10	CAR	3.73(0.24,7.35)
Europe		↑						CER	1.72(-1.71,5.30)
Europe		↑						RES	13.54(2.70,12.48)
Europe		↑					PM2.5	CAR	3.96(1.26,9.54)
Europe		↑						CER	0.73(-4.03,5.80)
Europe		↑						RES	1.13(-10.72,9.12)
Europe	16	Middleton N, Yiallouros P, Kleanthous S, et al. A 10-year time-series analysis of respiratory and cardiovascular morbidity in Nicosia, Cyprus: the effect of short-term changes in air pollution and dust storms[J]. Environ Health, 2008, 7(39): 10.1186.	Nicosia, Cyprus, 2004	All ages	Morbidity	visibility,PM10>100ug/m3	PM10	MORD	4.8(0.7,9.0)
Europe		↑						CVD-MORD	10.4(-4.7,27.9)
Europe	17	Neophytou A M, Yiallouros P, Coull B A, et al. Particulate matter concentrations during desert dust outbreaks and daily mortality in Nicosia, Cyprus[J]. Journal of Exposure Science and Environmental Epidemiology, 2013, 23(3): 275-280.	Nicosia, Cyprus, 2004-2007		Mortality		PM10	TotM	0.13（-1.03,1.30)
Europe		↑						CAR	2.43（0.53，4.37）
Europe		↑						RES	0.79(-4.69,3.28)
West Africa	18	Martiny N, Chiapello I. Assessments for the impact of mineral dust on the meningitis incidence in West Africa[J]. Atmospheric Environment, 2013, 70: 245-253.	Mali and Niger, 2004-2009		Morbidity			Meningitis
West Africa	19	Deroubaix A, Martiny N, Chiapello I, et al. Suitability of OMI aerosol index to reflect mineral dust surface conditions: Preliminary application for studying the link with meningitis epidemics in the Sahel[J]. Remote Sensing of Environment, 2013, 133: 116-127.	Burkina Faso, Mali and Niger, 2005-2008		Morbidity			Meningitis
West Africa	20	De Longueville F, Hountondji Y, Ozer P, et al. The Air Quality in African Rural Environments. Preliminary Implications for Health: The Case of Respiratory Disease in the Northern Benin[J]. Water, Air, & Soil Pollution, 2014, 225(11): 1-13.	Northern Benin, 2003-2007	Age<5	Morbidity			ALRI	Incresed 12.5%
Middle East	21	Delangizan S, Jafari Motlagh Z. Dust Phenomenon Affects on Cardiovascular and Respiratory Hospitalizations and Mortality “A Case Study in Kermanshah, during March-September 2010-2011[J]. Iranian Journal of Health and Environment, 2013, 6(1): 65-76.	Kermanshah, Iran, 2010-2011		Mortality & Morbidity		PM10	RES&CAR	Increased 0.5%RES-MORD；1%CAR-MORD；0.3%heart diease mortality
Middle East	22	Godini H, Shams Khoramabadi G, Ebrahimzadeh F, et al. The relationship between dust storm pollution concentration and burden of hospital admissions for respiratory and heart diseases in hospitals of Kermanshah city in 2011[J]. Journal of Kermanshah University of Medical Sciences, 2013, 17(7): 442-448.	Kermanshah, Iran, 2011		Morbidity		PM10	RES&CAR
Middle East	23	Gdalevich M, Nissan E, Kordova-Biezuner L, et al. Measuring the acute health effects of dust storms: A matched analysis[J]. Epidemiology, 2009, 20(6): S186.	Eastern Israel, 2006-2008		Morbidity		PM10	CAR
Middle East	24	Vodonos A, Friger M, Katra I, et al. The impact of desert dust exposures on hospitalizations due to exacerbation of chronic obstructive pulmonary disease[J]. Air Quality, Atmosphere & Health, 2014: 1-7.	Be'er Sheva, Southern Israel	Age>18	Morbidity		PM10	COPD	0.43（0.14，0.73）
Middle East	25	Thalib L, Al-Taiar A. Dust storms and the risk of asthma admissions to hospitals in Kuwait[J]. Science of the Total Environment, 2012, 433: 347-351.	Kuwait, 1996-2000	Age<15	Morbidity		PM10	Asthma-MORD	7.1（2.4，11.7）
Middle East		↑						RES-MORD	5.6（3.6-7.5）
Middle East	26	Al-Taiar A, Thalib L. Short-term effect of dust storms on the risk of mortality due to respiratory, cardiovascular and all-causes in Kuwait[J]. International journal of biometeorology, 2014, 58(1): 69-77.	Kuwait, 1996-2001	All ages	Mortality	PM10>100ug/m3	PM10	TotM	-1.5(-3.0,0.0)
Middle East		↑						RES	-4.0(-1.2,4.0)
Middle East		↑						CAR	-1.4(-4.0,1.2)
East Asia	27	Wang J, Li S, Wang S, et al. Effects of Long-term Dust Exposure on Human Respiratory System Health in Minqin County, China[J]. Archives of environmental & occupational health, 2014 (just-accepted).	Minqin，China	All ages	Morbidity		PM10
East Asia	28	Meng Z, LU Bin. Dust events as a risk factor for daily hospitalization for respiratory and cardiovascular diseases in Minqin, China[J]. Atmospheric environment, 2007, 41(33): 7048-7058.	Minqin，China, 1994-2003	All ages	Morbidity		PM10	RES-MORD	Total,URTI,Pneumonia
East Asia		↑						CAR-MORD	Total,Hypentension,IHD
East Asia	29	Zhang Q, Zhang J, Yang Z, et al. Impact of PM< sub> 2.5</sub> Derived from Dust Events on Daily Outpatient Numbers for Respiratory and Cardiovascular Diseases in Wuwei, China[J]. Procedia Environmental Sciences, 2013, 18: 290-298.	Wuwei, China, 2004-2005	All ages	Morbidity		PM2.5	RES-MORD
East Asia		↑						CAR-MORD
East Asia	30	Tam W W S, Wong T W, Wong A H S, et al. Effect of dust storm events on daily emergency admissions for respiratory diseases[J]. Respirology, 2012, 17(1): 143-148. Hongkong	Hongkong, China, 1998-2002	All ages	Morbidity		PM10	RES_COPD	5.0(1.0-9.0)
East Asia	31	Tam W W, Wong T W, Wong A H. Effect of dust storm events on daily emergency admissions for cardiovascular diseases[J]. Circulation journal: official journal of the Japanese Circulation Society, 2011, 76(3): 655-660.	Hongkong, China, 1998-2003	All ages	Morbidity		PM10	CAR-MORD
East Asia	32	Tao Y, An X, Sun Z, et al. Association between dust weather and number of admissions for patients with respiratory diseases in spring in Lanzhou	Lanzhou, China, 2001-2005	Age>65	Morbidity		PM10	RES-MORD	1.25（0.54，1.98）
East Asia	33	Yu X H, Xi W W, Bao J W. The Relationship between Respiratory System Disease and the Sandstorm Weather in Lanzhou [J][J]. Gansu Meteorology, 2001, 3: 013.	Lan zhou, China	All ages	Morbidity
East Asia	34	Meng Z, Zhang J, Geng H, et al. The influence of dust storms on daily respiratory and circulatory outpatient number[J]. China Environmental Science, 2007, 27(1): 116-120.	Wuwei, China, 2004-2006	All ages	Morbidity		PM10	RES & CIR
East Asia	35	Chen X, NIU J, DING G. Effect of sand dust storm on incidence rate of respiratory diseases[J]. Journal of Environment and Health, 2007, 24(2): 63-65.	Wuwei, China, 2005	All ages	Morbidity		TSP	RES
East Asia	36	YANG Z, MENG Z, PAN J, et al. Epidemiological Survey on the Diseases of the Respiratory and Circulatory System among the People in a Region Where Dust Events Occurred Frequently [J][J]. Journal of Environmental & Occupational Medicine, 2008, 1: 004.	Minqin, China	All ages	Morbidity		PM10	RES
East Asia	37	Pan X C, Liu Y, Kim D S, et al. Effects of the particulate matter from the dust storm on the respiratory health of children in Inner Mongolia of China[J]. Epidemiology, 2006, 17(6): S202-S203.	Inner Mogolina, China	Children	Morbidity			RES
East Asia	38	Chen Y S, Sheen P C, Chen E R, et al. Effects of Asian dust storm events on daily mortality in Taipei, Taiwan[J]. Environmental Research, 2004, 95(2): 151-155.	Taipei, Taiwan, China, 1995-2000	All ages	Mortality		PM10	TotM	4.92%
East Asia		↑						RES	7.66%
East Asia		↑						CIR	2.59%
East Asia	39	Chen Y S, Yang C Y. Effects of Asian dust storm events on daily hospital admissions for cardiovascular disease in Taipei, Taiwan[J]. Journal of Toxicology and Environmental Health, Part A, 2005, 68(17-18): 1457-1464.	Taipei，Taiwan，China1996-2001	All ages	Morbidity		PM10	CVD-MORD	3.65%
East Asia	40	Yang C Y. Effects of Asian dust storm events on daily clinical visits for conjunctivitis in Taipei, Taiwan[J]. Journal of Toxicology and environmental Health, Part A, 2006, 69(18): 1673-1680.	Taipei，Taiwan，China1997-2001	All ages	Morbidity		PM10	Conjunctivitis	1.0%
East Asia	41	Yang C Y, Tsai S S, Chang C C, et al. Effects of Asian dust storm events on daily admissions for asthma in Taipei, Taiwan[J]. Inhalation toxicology, 2005, 17(14): 817-821.	Taipei, Taiwan, China	All ages	Morbidity		PM10	Asthma-MORD	0.72%
East Asia	42	Yang C Y, Cheng M H, Chen C C. Effects of Asian dust storm events on hospital admissions for congestive heart failure in Taipei, Taiwan[J]. Journal of Toxicology and Environmental Health, Part A, 2009, 72(5): 324-328.	Taipei, Taiwan, China, 1996-2001	All ages	Morbidity	Visibility	PM10	CHF	1.02（-0.06，2.24）
East Asia	43	Chiu H F, Tiao M M, Ho S C, et al. Effects of Asian dust storm events on hospital admissions for chronic obstructive pulmonary disease in Taipei, Taiwan[J]. Inhalation toxicology, 2008, 20(9): 777-781.	Taipei, Taiwan, China, 1996-2001	All ages	Morbidity		PM10	COPD	0.51（0.16，1.24）
East Asia	44	Cheng M F, Ho S C, Chiu H F, et al. Consequences of exposure to Asian dust storm events on daily pneumonia hospital admissions in Taipei, Taiwan[J]. Journal of Toxicology and Environmental Health, Part A, 2008, 71(19): 1295-1299	Taipei, Taiwan, China, 1996-2001	All ages	Morbidity		PM10	Pneumonia	0.44(0.02,0.88)
East Asia	45	Yang C Y, Chen Y S, Chiu H F, et al. Effects of Asian dust storm events on daily stroke admissions in Taipei, Taiwan[J]. Environmental research, 2005, 99(1): 79-84.	Taipei, Taiwan, China, 1996-2001	All ages	Morbidity		PM10	Stroke	0.45%
East Asia	46	Kang J H, Keller J J, Chen C S, et al. Asian dust storm events are associated with an acute increase in pneumonia hospitalization[J]. Annals of epidemiology, 2012, 22(4): 257-263.	Taipei, Taiwan, China, 2000-2009	Age 7-17	Morbidity	PM10>100ug/m3	PM10	Pneumonia	0.43（0.027）
East Asia	47	Kang J H, Liu T C, Keller J, et al. Asian dust storm events are associated with an acute increase in stroke hospitalisation[J]. Journal of epidemiology and community health, 2013, 67(2): 125-131.	Taipei, Taiwan, China, 2000-2009	All ages	Morbidity		PM10	Stroke
East Asia	48	Chan C C, Chuang K J, Chen W J, et al. Increasing cardiopulmonary emergency visits by long-range transported Asian dust storms in Taiwan[J]. Environmental research, 2008, 106(3): 393-400.	Taipei, Taiwan, China, 1995-2002	All ages	Morbidity	PM10>100ug/m3	PM10	CAR-MORD	0.19（0.02，0.33）
East Asia	49	Chang C C, Lee I M, Tsai S S, et al. Correlation of Asian dust storm events with daily clinic visits for allergic rhinitis in Taipei, Taiwan[J]. Journal of Toxicology and Environmental Health, Part A, 2006, 69(3): 229-235.	Taipei, Taiwan, China, 1997-2001	All ages	Morbidity		PM10	AR-MORD	19%
East Asia	50	Chan C C, Ng H C. A case-crossover analysis of Asian dust storms and mortality in the downwind areas using 14-year data in Taipei[J]. Science of the Total Environment, 2011, 410: 47-52.	Taipei, Taiwan, China, 1994-2007	All ages	Mortality	Satelliate，BTA，PM10>100ug/m3	PM10	TotM	0.79（0.12，1.45）
East Asia		↑		Age>65				CAR	1.24（0.00,2.48)
East Asia		↑						RES	-0.50(-2.44,1.57)
East Asia	51	Lai L W, Cheng W L. The impact of air quality on respiratory admissions during Asian dust storm periods[J]. International journal of environmental health research, 2008, 18(6): 429-450.	Taipei, Taiwan, China, 2000-2004	All ages	Morbidity		PM10	RES
East Asia	52	Chien L C, Yang C H, Yu H L. Estimated effects of Asian Dust Storms on spatiotemporal distributions of clinic visits for respiratory diseases in Taipei children (Taiwan)[J]. Environmental health perspectives, 2012, 120(8): 1215.	Taipei, Taiwan, China, 1997-2007	Age<14	Morbidity	Satelliate，PM10>100ug/m3	PM10	RES-MORD	3.38(3.28,3.48)
East Asia	53	Yu H L, Chien L C, Yang C H. Asian Dust Storm Elevates Children’s Respiratory Health Risks: A Spatiotemporal Analysis of Children’s Clinic Visits across Taipei (Taiwan)[J]. PloS one, 2012, 7(7): e41317.	Taipei, Taiwan, China, 1997-2007	Age<15	Morbidity		PM10	RES-MORD
East Asia	54	Bell M L, Levy J K, Lin Z. The effect of sandstorms and air pollution on cause-specific hospital admissions in Taipei, Taiwan[J]. Occupational and environmental medicine, 2008, 65(2): 104-111.	Taipei, Taiwan, China, 1995-2002	All ages	Morbidity
East Asia	55	Lee H, Honda Y, Lim Y H, et al. Effect of Asian dust storms on mortality in three Asian cities[J]. Atmospheric Environment, 2014, 89: 309-317.	Taipei, Taiwan, China	All ages	Mortality			TotM
East Asia	56	Kashima S, Yorifuji T, Tsuda T, et al. Asian dust and daily all-cause or cause-specific mortality in western Japan[J]. Occupational and environmental medicine, 2012, 69(12): 908-915.	Western Japan, 2005-2010	Age>65	Mortality		PM10	Heart disease	0.6(0.1,1.1)
East Asia		↑						ISH	0.8(0.1,1.6)
East Asia		↑						Arrhythmia	2.1(0.3,3.9)
East Asia		↑						Pneumonia	0.5(0.2,0.8)
East Asia	57	Watanabe M, Yamasaki A, Burioka N, et al. Correlation between Asian dust storms and worsening asthma in Western Japan[J]. Allergology International, 2011, 60(3): 267.	Japan, 2007	All ages	Morbidity			Asthma
East Asia	58	Watanabe M, Kurai J, Igishi T, et al. Influence of Asian desert dust on lower respiratory tract symptoms in patients with asthma over 4 years[J]. Yonago acta medica, 2012, 55(2): 41.	Japan	All ages	Morbidity			Asthma
East Asia	59	Otani S, Onishi K, Mu H, et al. The effect of Asian dust events on the daily symptoms in Yonago, Japan: a pilot study on healthy subjects[J]. Archives of environmental & occupational health, 2011, 66(1): 43-46.	Yonago，Japan, 2009	All ages	Morbidity
East Asia	60	Ueda K, Nitta H, Odajima H. The effects of weather, air pollutants, and Asian dust on hospitalization for asthma in Fukuoka[J]. Environmental health and preventive medicine, 2010, 15(6): 350-357.	Fukuoka，Japan, 2001-2007	All ages	Morbidity		PM10	Asthma	10.5（1.5，20.3）
East Asia	61	Ueda K, Shimizu A, Nitta H, et al. Long-range transported Asian Dust and emergency ambulance dispatches[J]. Inhalation toxicology, 2012, 24(12): 858-867.	Japan, 2003-2007	All ages	Mortality&Morbidity	BAT	PM10	All cause	12.1（2.3，22.9）
East Asia		↑						CAR	20.8（3.5，40.9）
East Asia	62	Kanatani K T, Ito I, Al-Delaimy W K, et al. Desert dust exposure is associated with increased risk of asthma hospitalization in children[J]. American journal of respiratory and critical care medicine, 2010, 182(12): 1475.	Toyama,Japan, 2005-2009	Age<15	Morbidity	LIDAR	PM10	Asthma
East Asia	63	Onishi K, Kurosaki Y, Otani S, et al. Atmospheric transport route determines components of Asian dust and health effects in Japan[J]. Atmospheric Environment, 2012, 49: 94-102.	Japan		Morbidity			Skin
East Asia	64	Onishi K, Otani S, Yoshida A, et al. Adverse health effects of Asian dust particles and heavy metals in Japan[J]. Asia-Pacific Journal of Public Health, 2012.	Japan		Morbidity			Skin
East Asia	65	Otani S, Onishi K, Mu H, et al. The relationship between skin symptoms and allergic reactions to Asian dust[J]. International journal of environmental research and public health, 2012, 9(12): 4606-4614	Japan		Morbidity			Skin
East Asia	66	Kamouchi M, Ueda K, Ago T, et al. Relationship Between Asian Dust and Ischemic Stroke A Time-Stratified Case-Crossover Study[J]. Stroke, 2012, 43(11): 3085-3087.	Fukuoka, Japan, 1999-2010	All ages	Morbidity		PM10	Stroke
East Asia	67	Goto K, Nmor J C, Kurahashi R, et al. Relationship between influx of yellow dust and bronchial asthma mortality using satellite data[J]. Scientific Research and Essays, 2010, 5(24): 4044-4052.	Nagasaki, Japan, 1998-2007	All ages	Mortality	Satelliate	PM10	Asthma
East Asia	68	Hashizume M, Nishiwaki Y, Michikawa T, et al. Effects of Asian dust events on daily mortality in Nagasaki, Japan[J]. Epidemiology, 2011, 22(1): S130.	Nagasaki, Japan, 1990-2006	All ages	Mortality
East Asia	69	Lee H, Honda Y, Lim Y H, et al. Effect of Asian dust storms on mortality in three Asian cities[J]. Atmospheric Environment, 2014, 89: 309-317.	Kitakyushu, Japan
East Asia	70	Kwon H J, Cho S H, Chun Y, et al. Effects of the Asian dust events on daily mortality in Seoul, Korea[J]. Environmental Research, 2002, 90(1): 1-5.	Seoul, Korea, 1995-1998	Age>65	Mortality		PM10	TotM	0.17（-0.16，0.53）
East Asia		↑						CAR & RES	0.41(-0.38,1.26)
East Asia	71	Kwon et al.2000	Seoul, Korea, 1991-1998
East Asia	72	Lee J W, Lee K K. Effects of Asian dust events on daily asthma patients in Seoul, Korea[J]. Meteorological Applications, 2013.	Seoul, Korea, 2005-2008	All ages	Morbidity	BAT,PM10>100ug/m3	PM10	Asthma	1.8%
East Asia	73	Lee J T, Son J Y, Cho Y S. A comparison of mortality related to urban air particles between periods with Asian dust days and without Asian dust days in Seoul, Korea, 2000–2004[J]. Environmental research, 2007, 105(3): 409-413.	Seoul, Korea, 2000-2004	All ages	Mortality		PM10	TotM	0.17(0.05,0.31) with
East Asia	74	Hwang S S, Cho S H, Kwon H J. Effects of the severe Asian dust events on daily mortality during the spring of 2002, in Seoul, Korea[J]. Journal of Preventive Medicine and Public Health, 2005, 38(2): 197-202.	Seoul, Korea, 2002	Age>65	Mortality		PM10	TotM	0.102(-0.20,0.43)
East Asia		↑						RES	1.49(0.03,3.47)
East Asia		↑						CAR	-0.25(-0.80,0.40)
East Asia	75	Hwang S, Jang Y, Kim H. The Asian Dust Events and Emergency Department Visits with Atopic Asthma in Seoul, Korea[J]. Epidemiology, 2008, 19(6): S360.	Seoul, Korea	All ages	Morbidity		PM10	Asthma
East Asia	76	Hwang S S, Cho S H, Kang D, et al. THE ASIAN DUST EVENTS AND HOSPITAL ADMISSIONS WITH RESPIRATORY AND CARDIOVASCULAR DISEASE IN SEOUL, KOREA: ISEE-249[J]. Epidemiology, 2003, 14(5): S48.	Seoul，Korea, 2000-2002	All ages	Morbidity		PM10	CAR
East Asia	77	Hwang S S, Cho S H, Kim H, et al. The Asian Dust Events and Emergency Department Visits With Respiratory and Cardiovascular Disease in Seoul, Korea[J]. Epidemiology, 2004, 15(4): S127-S128.	Seoul，Korea, 2002	All ages	Morbidity		PM10	CAR
East Asia	78	Hwang S S, Cho S H, Kwon H J. Effects of the Asian dust events on mortality in the Spring of 2002, Seoul, Korea[J]. Epidemiology, 2004, 15(4): S126.	Seoul，Korea, 2000-2002	All ages	Mortality		PM10	TotM
East Asia	79	Gwack J, Hwang S S, Kwon H J, et al. Effects of Asian dust events on diurnal variation of peak expiratory flow rate in children with bronchial asthma and healthy children[J]. Epidemiology, 2005, 16(5): S109-S110.	Seoul，Korea	Children	Morbidity		PM10	PEFR
East Asia	80	Lee H, Honda Y, Lim Y H, et al. Effect of Asian dust storms on mortality in three Asian cities[J]. Atmospheric Environment, 2014, 89: 309-317.	3 cities, Asian	All ages	Mortality		PM10	TotM
East Asia	81	PARK J W, LIM Y H, KYUNG S Y, et al. Effects of ambient particulate matter on peak expiratory flow rates and respiratory symptoms of asthmatics during Asian dust periods in Korea[J]. Respirology, 2005, 10(4): 470-476	Incheon，Korea, 2002	Children	Morbidity		PM10	Asthma	0.39(-0.08,1.32)
East Asia	82	Yoo Y, Choung J T, Yu J, et al. Acute effects of Asian dust events on respiratory symptoms and peak expiratory flow in children with mild asthma[J]. Journal of Korean medical science, 2008, 23(1): 66-71.	Seoul，Korea, 2004	Children	Morbidity		PM10	Asthma
East Asia	83	Kim H S, Kim D S, Kim H, et al. Relationship between mortality and fine particles during Asian dust, smog–Asian dust, and smog days in Korea[J]. International journal of environmental health research, 2012, 22(6): 518-530.	Seoul，Korea, 2003-2006	Age>75	Mortality		PM2.5	TotM	0.3(0.1,0.5)
East Asia		↑						CAR	0.2(-0.1,0.5)
East Asia	84	Lee H, Kim H, Honda Y, et al. Effect of Asian dust storms on daily mortality in seven metropolitan cities of Korea[J]. Atmospheric Environment, 2013, 79: 510-517.	7 cities of Korea, 2001-2009	All ages	Mortality		PM10	TotM	0.15(0.00,0.30)
East Asia		↑						CAR	0.30(0.01,0.59)
East Asia		↑						RES	0.25(-0.33,0.86)
East Asia	85	Hong Y C, Pan X C, Kim S Y, et al. Asian Dust Storm and pulmonary function of school children in Seoul[J]. Science of the total environment, 2010, 408(4): 754-759.	Seoul，Korea, 2007	Children	Morbidity		PM10	PEFR
East Asia	86	Mu H, Battsetseg B, Ito T Y, et al. Health effects of dust storms: subjective eye and respiratory system symptoms in inhabitants in Mongolia[J]. Journal of environmental health, 2011, 73(8).	Mongolia	All ages	Morbidity		PM10	Eye lacrimation
South Asia	87	Gupta P, Singh S, Kumar S, et al. Effect of dust aerosol in patients with asthma[J]. Journal of Asthma, 2012, 49(2): 134-138.	India	All ages	Morbidity		PM10	Asthma
Central Asia	88	Wiggs G F S, O'hara S L, Wegerdt J, et al. The dynamics and characteristics of aeolian dust in dryland Central Asia: possible impacts on human exposure and respiratory health in the Aral Sea basin[J]. The Geographical Journal, 2003, 169(2): 142-157.	Karakalpakstan,Uzbek Repulibc, 2000-2001	All ages	Morbidity			RES
Central Asia	89	Madzhidov N M, Khalimova Z I, Kilichev I A. [Cerebrovascular diseases in Uzbekistan during the critical meteorological days of the" Afghan storm"][J]. Vserossiiskoe obshchestvo psikhiatrov, 1993, 94(2): 28-30.	Uzbek Repulibc	All ages	Morbidity			CER
Australia	90	Johnston F, Hanigan I, Henderson S, et al. Extreme air pollution events from bushfires and dust storms and their association with mortality in Sydney, Australia 1994–2007[J]. Environmental research, 2011, 111(6): 811-816.	Sydney, Australia,1994-2007	All ages	Mortality		PM10	TotM	1.96(0.38,3.78)
Australia		↑						CAR	1.52(-1.65,5.57)
Australia		↑						RES	2.91(-4.18,3.04)
Australia	91	Hansen A, Bi P, Nitschke M, et al. Particulate air pollution and cardiorespiratory hospital admissions in a temperate Australian city: A case-crossover analysis[J]. Science of the Total Environment, 2012, 416: 48-52.	Adelaide, South Australia, 2001-2007	All ages	Morbidity		PM10	CAR	0.37(-0.51,1.25)
Australia		↑						RES	0.88(-0.10,1.87)
Australia		↑					PM2.5	CAR	2.71(0.16,5.33)
Australia		↑						RES	0.35(-2.45,3.23)
Australia	92	Merrifield A, Schindeler S, Jalaludin B, et al. Health effects of the September 2009 dust storm in Sydney, Australia: did emergency department visits and hospital admissions increase?[J]. Environmental Health, 2013, 12(1): 32	Sydney, Australia, 2009	All ages	Morbidity		Emegercy	All Causes	4.3(2.8,5.8)
Australia		↑						CAR	-4.3(-9.0,0.7)
Australia		↑						RES	19.9(14.5,25.5)
Australia		↑						Asthma	23(9.9,37.7)
Australia		↑					Hospital Admission	All Causes	-1.3(0.5,14.9)
Australia		↑						CAR	-1.5(-6.4,3.8)
Australia		↑						RES	-10.2(-14.7,-5.5)
Australia		↑						Asthma	14.1(-0.9,31.3)
Australia	93	Barnett A G, Fraser J F, Munck L. The effects of the 2009 dust storm on emergency admissions to a hospital in Brisbane, Australia[J]. International journal of biometeorology, 2012, 56(4): 719-726.	Brisbane, Australia, 2009	All ages	Morbidity		Hospital Admission		Emegercy increased 39%
Australia	94	Rutherford S, Clark E, McTainsh G, et al. Characteristics of rural dust events shown to impact on asthma severity in Brisbane, Australia[J]. International Journal of Biometeorology, 1999, 42(4): 217-225.	Brisbane, Australia, 1992-1994	All ages	Morbidity			Asthma
North Ameica	95	Bennett C M, McKendry I G, Kelly S, et al. Impact of the 1998 Gobi dust event on hospital admissions in the Lower Fraser Valley, British Columbia[J]. Science of the total environment, 2006, 366(2): 918-925.	British Colombia, Canada,1997-1999		Morbidity		Hospital Admission
North Ameica	96	Schwartz J, Norris G, Larson T, et al. Episodes of high coarse particle concentrations are not associated with increased mortality[J]. Environmental Health Perspectives, 1999, 107(5): 339.	Spokane,WA, U.S. A, 1989-1995		Mortality
North Ameica	97	Grineski S E, Staniswalis J G, Bulathsinhala P, et al. Hospital admissions for asthma and acute bronchitis in El Paso, Texas: Do age, sex, and insurance status modify the effects of dust and low wind events?[J]. Environmental research, 2011, 111(8): 1148-1155.	Texus, U.S.A		Morbidity			Asthma
Central America	98	Ortiz-Martínez M, Rivera-Ramírez E, Méndez-Torres L, et al. Role of chemical and biological constituents of PM10 from Saharan Dust in the exacerbation of asthma in Puerto Rico[J]. Biodiversity science for humanity. Athens: Athens Institute for Education and Research (ATINER), 2010: 101-118.	Puerto Rico, 2004	Children	Morbidity		PM10	Asthma
Central America	99	Cadelis G, Tourres R, Molinie J. Short-term effects of the particulate pollutants contained in Saharan dust on the visits of children to the emergency department due to asthmatic conditions in Guadeloupe (French Archipelago of the Caribbean)[J]. PloS one, 2014, 9(3): e91136.	Guadeloupe	Children	Morbidity		PM10	Asthma	9.1(7.1-11.1)
Central America		↑					PM2.5-10	Asthma	4.5(2.5-6.5)
Central America	100	Lopez-Villarrubia E, Iñiguez C, Ballester F, et al. Association of Fine and Coarse Particles with Mortality in Canary Island Cities Affected by Saharan Dust Intrusion[J]. Epidemiology, 2009, 20(6): S199-200.	Canary Island		Mortality			TotM
Central America	101	Monteil M A. Saharan dust clouds and human health in the English-speaking Caribbean: what we know and don’t know[J]. Environmental geochemistry and health, 2008, 30(4): 339-343.	Trinidad,Caribbean		Mortality&Morbidity
Central America	102	Gyan K, Henry W, Lacaille S, et al. African dust clouds are associated with increased paediatric asthma accident and emergency admissions on the Caribbean island of Trinidad[J]. International journal of biometeorology, 2005, 49(6): 371-376.	Trinidad,Caribbean		Morbidity			Asthma
Central America	103	Prospero J M, Blades E, Naidu R, et al. Relationship between African dust carried in the Atlantic trade winds and surges in pediatric asthma attendances in the Caribbean[J]. International journal of biometeorology, 2008, 52(8): 823-832.	Caribbean, 1996-1997		Morbidity			Asthma

## Sheet: Table S2
Table S2 Summary of total 73 pathological studies included with searching conditions for health effects of desert dust
No.	Reference
1	Hiyoshi K, Ichinose T, Sadakane K, et al. Asian sand dust enhances ovalbumin-induced eosinophil recruitment in the alveoli and airway of mice[J]. Environmental research, 2005, 99(3): 361-368.
2	Ichinose T, Nishikawa M, Takano H, et al. Pulmonary toxicity induced by intratracheal instillation of Asian yellow dust (Kosa) in mice[J]. Environmental toxicology and pharmacology, 2005, 20(1): 48-56.
3	He M, Ichinose T, Yoshida S, et al. Aggravating effects of Asian sand dust on lung eosinophilia in mice immunized beforehand by ovalbumin[J]. Inhalation toxicology, 2012, 24(11): 751-761.
4	He M, Ichinose T, Yoshida S, et al. Induction of immune tolerance and reduction of aggravated lung eosinophilia by co-exposure to Asian sand dust and ovalbumin for 14 weeks in mice[J]. Allerg Asthma Clin Immunol, 2013, 9: 19-29.
5	Yoshida S, Hiyoshi K, Ichinose T, et al. Aggravating effect of natural sand dust on male reproductive function in mice[J]. Reproductive medicine and biology, 2009, 8(4): 151-156.
6	Rattanapinyopituk K, Shimada A, Morita T, et al. Ultrastructural changes in the air–blood barrier in mice after intratracheal instillations of Asian sand dust and gold nanoparticles[J]. Experimental and Toxicologic Pathology, 2013, 65(7): 1043-1051.
7	Hwang Y J, Jeung Y S, Seo M H, et al. Asian dust and titanium dioxide particles-induced inflammation and oxidative DNA damage in C57BL/6 mice[J]. Inhalation toxicology, 2010, 22(13): 1127-1133.
8	Liu B, Ichinose T, He M, et al. Lung inflammation by fungus, Bjerkandera adusta isolated from Asian sand dust (ASD) aerosol and enhancement of ovalbumin-induced lung eosinophilia by ASD and the fungus in mice[J]. Allergy, Asthma & Clinical Immunology, 2014, 10(1): 10.
9	He M, Ichinose T, Yoshida S, et al. Airborne Asian sand dust enhances murine lung eosinophilia[J]. Inhalation toxicology, 2010, 22(12): 1012-1025.
10	Yanagisawa R, Takano H, Ichinose T, et al. Gene expression analysis of murine lungs following pulmonary exposure to Asian sand dust particles[J]. Experimental biology and medicine, 2007, 232(8): 1109-1118.
11	He M, Ichinose T, Yoshida S, et al. Asian sand dust enhances murine lung inflammation caused by< i> Klebsiella pneumoniae</i>[J]. Toxicology and applied pharmacology, 2012, 258(2): 237-247.
12	Ren Y, Ichinose T, He M, et al. Enhancement of OVA-induced murine lung eosinophilia by co-exposure to contamination levels of LPS in Asian sand dust and heated dust[J]. Allergy, Asthma Clinical Immunology, 2014, 10(30): 1492-10.
13	Ren Y, Ichinose T, He M, et al. Aggravation of ovalbumin-induced murine asthma by co-exposure to desert-dust and organic chemicals: an animal model study[J]. Environmental Health, 2014, 13(1): 83.
14	Ichinose T, Yoshida S, Sadakane K, et al. Effects of asian sand dust, Arizona sand dust, amorphous silica and aluminum oxide on allergic inflammation in the murine lung[J]. Inhalation toxicology, 2008, 20(7): 685-694.
15	Ichinose T, Sadakane K, Takano H, et al. Enhancement of mite allergen-induced eosinophil infiltration in the murine airway and local cytokine/chemokine expression by Asian sand dust[J]. Journal of Toxicology and Environmental Health, Part A, 2006, 69(16): 1571-1585.
16	Jung J H, Kang I G, Cha H E, et al. Effect of Asian Sand Dust on Mucin Production in NCI-H292 Cells and Allergic Murine Model[J]. Otolaryngology--Head and Neck Surgery, 2012, 146(6): 887-894.
17	He M, Ichinose T, Song Y, et al. Effects of two Asian sand dusts transported from the dust source regions of Inner Mongolia and northeast China on murine lung eosinophilia[J]. Toxicology and applied pharmacology, 2013, 272(3): 647-655.
18	Ghio A J, Kummarapurugu S T, Tong H, et al. Biological effects of desert dust in respiratory epithelial cells and a murine model[J]. Inhalation toxicology, 2014, 26(5): 299-309.
19	Kang I G, Jung J H, Kim S T. Asian Sand Dust Enhances Allergen-Induced Th2 Allergic Inflammatory Changes and Mucin Production in BALB/c Mouse Lungs[J]. Allergy, asthma & immunology research, 2012, 4(4): 206-213.
20	Gunasekar P G, Wagner D, Olabisi A, et al. Acute Effects of Oral Exposure to Middle East PM 10 Dust on Systemic Parameters in Laboratory Mouse (Mus musculus)[C]//2008 Joint Meeting of The Geological Society of America, Soil Science Society of America, American Society of Agronomy, Crop Science Society of America, Gulf Coast Association of Geological Societies with the Gulf Coast Section of SEPM. …
21	Song Y, Ichinose T, Morita K, et al. Asian sand dust causes subacute peripheral immune modification with NF‐κB activation[J]. Environmental toxicology, 2013.
22	Kim S T, Lee E J, Jung J H, et al. The Effect of Asian Sand Dust in Allergic Inflammation of Allergic Mouse[J]. Korean Journal of Otorhinolaryngology-Head and Neck Surgery, 2009, 52(6): 498-505.
23	Wilfong E R, Lyles M, Rietcheck R L, et al. The acute and long-term effects of Middle East sand particles on the rat airway following a single intratracheal instillation[J]. Journal of Toxicology and Environmental Health, Part A, 2011, 74(20): 1351-1365.
24	Dorman D C, Mokashi V, Wagner D J, et al. Biological responses in rats exposed to cigarette smoke and Middle East sand (dust)[J]. Inhalation toxicology, 2012, 24(2): 109-124.
25	Geng H, Meng Z, Zhang Q. In vitro responses of rat alveolar macrophages to particle suspensions and water-soluble components of dust storm PM< sub> 2.5</sub>[J]. Toxicology in vitro, 2006, 20(5): 575-584.
26	Geng H, Meng Z, Zhang Q. Effects of blowing sand fine particles on plasma membrane permeability and fluidity, and intracellular calcium levels of rat alveolar macrophages[J]. Toxicology letters, 2005, 157(2): 129-137.
27	Meng Z, Zhang Q. Damage effects of dust storm PM< sub> 2.5</sub> on DNA in alveolar macrophages and lung cells of rats[J]. Food and chemical toxicology, 2007, 45(8): 1368-1374.
28	Meng Z, Zhang Q. Oxidative damage of dust storm fine particles instillation on lungs, hearts and livers of rats[J]. Environmental toxicology and pharmacology, 2006, 22(3): 277-282.
29	Huang X, Jin Y, Guo X, et al. [Impact of dust storm PM2. 5 and PM10 on the phagocytic function of alveolar macrophages of rat][J]. Wei sheng yan jiu= Journal of hygiene research, 2004, 33(2): 154-157.
30	Ogugbuaja V O, Gwaski P, Khan I Z. Environmental toxicology: Acute effects of suspended particulate matter (dust) on hematological indices of albino rats[J]. Bulletin of the Chemical Society of Ethiopia, 2004, 18(2).
31	Huang X, Jin Y, Guo X, et al. Study on the effects of PM2. 5 and PM10 in sand storm dust on secretion of inflammatory factors in alveolar macrophages of rat[J]. J. Environ. Health, 2004, 21: 38-41.
32	Yibulayin X, Silamu D, Miao-Li F A N. Immunologic injury of respiratory system of rats induced by dust storm PM2. 5[J]. Journal of Xinjiang Medical University, 2011, 10: 012.
33	Adamson I Y R, Prieditis H, Vincent R. Soluble and insoluble air particle fractions induce differential production of tumor necrosis factor α in rat lung[J]. Experimental lung research, 2004, 30(5): 355-368.
34	Ichinose T, Hiyoshi K, Yoshida S, et al. Asian sand dust aggravates allergic rhinitis in guinea pigs induced by Japanese cedar pollen[J]. Inhalation toxicology, 2009, 21(12): 985-993.
35	Kobayashi Y, Shimada A, Nemoto M, et al. Adverse effects of inhaled sand dust particles on the respiratory organs of sheep and goats exposed to severe sand storms in Mongolia[J]. Folia Histochemica et Cytobiologica, 2014, 52(3): 244-249.
36	Naota M, Mukaiyama T, Shimada A, et al. Pathological study of acute pulmonary toxicity induced by intratracheally instilled Asian sand dust (kosa)[J]. Toxicologic pathology, 2010, 38(7): 1099-1110.
37	Taylor K, Foster M L, Law J M H, et al. Assessment of geographical variation in the respiratory toxicity of desert dust particles[J]. Inhalation toxicology, 2013, 25(7): 405-416.
38	Rezaei M, Salimi A, Taghidust M, et al. A comparison of toxicity mechanisms of dust storm particles collected in the southwest of Iran on lung and skin using isolated mitochondria[J]. Toxicological & Environmental Chemistry, 2014 (ahead-of-print): 1-17.
39	Naota M, Shiotsu S, Shimada A, et al. Pathological study of chronic pulmonary toxicity induced by intratracheally instilled Asian sand dust (Kosa)[J]. Toxicologic pathology, 2013, 41(1): 48-62.
40	Choi H, Shin D W, Kim W, et al. Asian dust storm particles induce a broad toxicological transcriptional program in human epidermal keratinocytes[J]. Toxicology letters, 2011, 200(1): 92-99.
41	Higashisaka K, Fujimura M, Taira M, et al. Asian Dust Particles Induce Macrophage Inflammatory Responses via Mitogen-Activated Protein Kinase Activation and Reactive Oxygen Species Production[J]. Journal of Immunology Research, 2014, 2014.
42	Wei A, Meng Z. Evaluation of micronucleus induction of sand dust storm fine particles (PM< sub> 2.5</sub>) in human blood lymphocytes[J]. Environmental toxicology and pharmacology, 2006, 22(3): 292-297.
43	Bing P. The studies of toxicity and potential lung fibrosis of desert dust [J][J]. JOURNAL OF HEALTH TOXICOLOGY, 1995, 4.
44	Pritchard R J, Ghio A J, Lehmann J R, et al. Oxidant generation and lung injury after particulate air pollutant exposure increase with the concentrations of associated metals[J]. Inhalation toxicology, 1996, 8(5): 457-477.
45	Geng H, Meng Z, Zhang Q. Effects of blowing sand fine particles on plasma membrane permeability and fluidity, and intracellular calcium levels of rat alveolar macrophages[J]. Toxicology letters, 2005, 157(2): 129-137.
46	GAO J, WANG Z, WANG S. Toxic Effect of Desert Dust of Northwest Areas of China on Alveolar Macrophages of Rats[J]. Journal of Environment and Health, 2008, 12: 009.
47	Centeno J A, Cook A, Weinstein P. Environmental toxicology and exposure to natural dust: The role of trace elements[J]. Chinese Journal of Geochemistry, 2006, 25: 222-223.
48	Ezeamuzie C I, Beg M U, Al-Ajmi D. Responses of alveolar macrophages to post-Gulf-War airborne dust from Kuwait[J]. Environment international, 1998, 24(1): 213-220.
49	Kim S T, Ye M K, Shin S H. Effects of Asian sand dust on mucin gene expression and activation of nasal polyp epithelial cells[J]. American journal of rhinology & allergy, 2011, 25(5): 303-306.
50	Jung J H, Kang I G, Cha H E, et al. Effect of Asian Sand Dust on Mucin Production in NCI-H292 Cells and Allergic Murine Model[J]. Otolaryngology--Head and Neck Surgery, 2012, 146(6): 887-894.
51	Yeo N K, Hwang Y J, Kim S T, et al. Asian sand dust enhances rhinovirus-induced cytokine secretion and viral replication in human nasal epithelial cells[J]. Inhalation toxicology, 2010, 22(12): 1038-1045.
52	Meng Z, Zhang Q. Damage effects of dust storm PM< sub> 2.5</sub> on DNA in alveolar macrophages and lung cells of rats[J]. Food and chemical toxicology, 2007, 45(8): 1368-1374.
53	Yamada P, Hatta T, Du M, et al. Inflammatory and degranulation effect of yellow sand on RBL-2H3 cells in relation to chemical and biological constituents[J]. Ecotoxicology and environmental safety, 2012, 84: 9-17.
54	Prahalad A K, Inmon J, Dailey L A, et al. Air pollution particles mediated oxidative DNA base damage in a cell free system and in human airway epithelial cells in relation to particulate metal content and bioreactivity[J]. Chemical research in toxicology, 2001, 14(7): 879-887.
55	Veranth J M, Reilly C A, Veranth M M, et al. Inflammatory cytokines and cell death in BEAS-2B lung cells treated with soil dust, lipopolysaccharide, and surface-modified particles[J]. Toxicological Sciences, 2004, 82(1): 88-96.
56	Veranth J M, Cutler N S, Kaser E G, et al. Effects of cell type and culture media on Interleukin-6 secretion in response to environmental particles[J]. Toxicology in vitro, 2008, 22(2): 498-509.
57	Choi Y J, Yin H Q, Park E J, et al. Gene Expression Analysis of So Called Asian Dust Extracts in Human Acute Myeloid Leukemia Cells[J]. Toxicological research, 2010, 26(1): 21.
58	Shin S H, Ye M K, Hwang Y J, et al. The effect of Asian sand dust-activated respiratory epithelial cells on activation and migration of eosinophils[J]. Inhalation toxicology, 2013, 25(11): 633-639.
59	Kyung S Y, Yoon J Y, Kim Y J, et al. Asian Dust Particles Induce TGF-β1 via Reactive Oxygen Species in Bronchial Epithelial Cells[J]. Tuberculosis and respiratory diseases, 2012, 73(2): 84-92.
60	Watanabe M, Kurai J, Tomita K, et al. Effects on asthma and induction of interleukin-8 caused by Asian dust particles collected in western Japan[J]. Journal of Asthma, 2014 (0): 1-8.
61	Deng F, Guo X, Liu H, et al. Effects of dust storm PM< sub> 2.5</sub> on cell proliferation and cell cycle in human lung fibroblasts[J]. Toxicology in vitro, 2007, 21(4): 632-638.
62	Kim Y H, Kim K S, Kwak N J, et al. Cytotoxicity of yellow sand in lung epithelial cells[J]. Journal of biosciences, 2003, 28(1): 77-81.
63	Song Y, Ichinose T, Yoshida Y. Asian sand dust induces autophagic markers and activates NF-{kappa} B in immune cells (P6377)[J]. The Journal of Immunology, 2013, 190: 201.6.
64	Yoshida Y, Song Y, Ichinose T. Particles such as an asian sand dust activate autophagic and apoptotic key molecules in CD11b positive cells[J]. The Journal of Immunology, 2012, 188: 106.6.
65	Kim J H, Jeon H K, Kim M K, et al. Particulate matter from Asian dust storms induces the expression of proinflammatory cytokine in A549 epithelial cells[J]. Tuberculosis and Respiratory Diseases, 2006, 60(6): 663-672.
66	Sun H, Shamy M, Kluz T, et al. Gene expression profiling and pathway analysis of human bronchial epithelial cells exposed to airborne particulate matter collected from Saudi Arabia[J]. Toxicology and applied pharmacology, 2012, 265(2): 147-157.
67	Rodríguez-Cotto R I, Ortiz-Martínez M G, Rivera-Ramírez E, et al. African Dust Storms Reaching Puerto Rican Coast Stimulate the Secretion of IL-6 and IL-8 and Cause Cytotoxicity to Human Bronchial Epithelial Cells (BEAS-2B)[J]. Health, 2013, 2013.
68	Kim A H, Chon S, Yoon J Y, et al. The Effect of Particulate Matter 10 from Asian Dust on the Production of Reactive Oxygen Species, TGF-β, NF-κB, PDGF-α and Fibronectin in MRC-5 Fibroblast Cells[J]. Tuberculosis and Respiratory Diseases, 2009, 67(6): 528-535.
69	Hwang Y J, Park G, Bae S H, et al. Asian Sand Dust (ASD)—Particle Matter (PM) effect on overexpress of tissue Transglutaminase2[J]. Developmental Biology, 2011, 356(1): 267.
70	Kobayashi Y, Shimada A, Nemoto M, et al. Adverse effects of inhaled sand dust particles on the respiratory organs of sheep and goats exposed to severe sand storms in Mongolia[J]. Folia Histochemica et Cytobiologica, 2014, 52(3): 244-249.
71	Soukup J M, Ghio A J, Becker S. Soluble components of Utah Valley particulate pollution alter alveolar macrophage function in vivo and in vitro[J]. Inhalation toxicology, 2000, 12(5): 401-414.
72	Moog C R. In Vitro Particle Exposure To United States Southwestern Sand Dust[D]. , 2013.
73	Osornio-Vargas A R, Serrano J, Rojas-Bracho L, et al. < i> In vitro</i> biological effects of airborne PM< sub> 2.5</sub> and PM< sub> 10</sub> from a semi-desert city on the Mexico–US border[J]. Chemosphere, 2011, 83(4): 618-626.

## Sheet: Table S3
Table S3 Summary of total 54 general identified airborne microbiology studies related to dust storms over the world								0.037037
Source	Location	Biological components	References
Bovallius et al. (1980)	Sweden	Bacteria	Bovallius Å, Roffey R, Henningson E. LONG‐RANGE TRANSMISSION OF BACTERIA[J]. Annals of the New York Academy of Sciences, 1980, 353(1): 186-200.
Kwaasi et al. (1998)	Saudi Arabia	Bacteria and Fungi	Kwaasi A A A, Parhar V R S, Al‐Mohanna F A A, et al. Aeroallergens and viable microbes in sandstorm dust[J]. Allergy, 1998, 53(3): 255-265.
Griffin et al. (2001)	Caribbean	Bacteria and Fungi	Griffin D W, Garrison V H, Herman J R, et al. African desert dust in the Caribbean atmosphere: microbiology and public health[J]. Aerobiologia, 2001, 17(3): 203-213.
Yeo and Kim (2002)	Korea	Fungi	Yeo H G, Kim J H. SPM and fungal spores in the ambient air of west Korea during the Asian dust (Yellow sand) period[J]. Atmospheric Environment, 2002, 36(35): 5437-5442.
Griffin et al. (2003)	Caribbean	Bacteria and Fungi	Griffin D W, Kellogg C A, Garrison V H, et al. Atmospheric microbiology in the northern Caribbean during African dust events[J]. Aerobiologia, 2003, 19(3-4): 143-157.
Shinn et al. (2003)	Globe	Fungi Spores	Shinn E A, Griffin D W, Seba D B. Atmospheric transport of mold spores in clouds of desert dust[J]. Archives of environmental health, 2003, 58(8): 498-504.
Kellogg et al. (2004)	Mali, Africa	Bacteria and Fungi	Kellogg C A, Griffin D W, Garrison V H, et al. Characterization of aerosolized bacteria and fungi from desert dust events in Mali, West Africa[J]. Aerobiologia, 2004, 20(2): 99-110.
Wu et al. (2004)	Taiwan	Fungi	Wu P C, Tsai J C, Li F C, et al. Increased levels of ambient fungal spores in Taiwan are associated with dust events from China[J]. Atmospheric Environment, 2004, 38(29): 4879-4886.
Echigo et al. (2005)	Japan	Bacteria	Echigo A, Hino M, Fukushima T, et al. Endospores of halophilic bacteria of the family Bacillaceae isolated from non-saline Japanese soil may be transported by Kosa event (Asian dust storm)[J]. Saline systems, 2005, 1(8).
Lyles et al. (2005)	Kuwait	Bacteria and Fungi	Lyles M B, Fredrickson H L, Bednar A J, et al. The chemical, biological, and mechanical characterization of airborne micro-particulates from Kuwait. Abstr[C]//8th Ann. Force Health Protect. Conf., session. 2005, 2586.
Prospero et al. (2005)	Barbados	Bacteria and Fungi	Prospero J M, Blades E, Mathison G, et al. Interhemispheric transport of viable fungi and bacteria from Africa to the Caribbean with soil dust[J]. Aerobiologia, 2005, 21(1): 1-19.
Schlesinger et al. (2006)	Isreal	Fungi	Schlesinger P, Mamane Y, Grishkan I. Transport of microorganisms to Israel during Saharan dust events[J]. Aerobiologia, 2006, 22(4): 259-273.
Griffin et al. (2006)	Tropical mid-Atlanic ridge	Bacteria and Fungi	Griffin D W, Westphal D L, Gray M A. Airborne microorganisms in the African desert dust corridor over the mid-Atlantic ridge, Ocean Drilling Program, Leg 209[J]. Aerobiologia, 2006, 22(3): 211-226.
Kellogg et al. (2006)	Globe	Bacteria and Fungi	Kellogg C A, Griffin D W. Aerobiology and the global transport of desert dust[J]. Trends in ecology & evolution, 2006, 21(11): 638-644.
Griffin et al. (2007)	Turkey	Bacteria and Fungi	Griffin D W, Kubilay N, Koçak M, et al. Airborne desert dust and aeromicrobiology over the Turkish Mediterranean coastline[J]. Atmospheric environment, 2007, 41(19): 4050-4062.
Hua et al. (2007)	Japan	Bacteria	Hua N P, Kobayashi F, Iwasaka Y, et al. Detailed identification of desert-originated bacteria carried by Asian dust storms to Japan[J]. Aerobiologia, 2007, 23(4): 291-298.
Wu et al. (2007)	Taiwan	Fungi	Wu Y H, Chan C C, Rao C Y, et al. Characteristics, determinants, and spatial variations of ambient fungal levels in the subtropical Taipei metropolis[J]. Atmospheric Environment, 2007, 41(12): 2500-2509.
Fierer et al. (2008)	U.S.	Bacteria and Fungi	Fierer N, Liu Z, Rodriguez-Hernandez M, et al. Short-term temporal variability in airborne bacterial and fungal populations[J]. Applied and environmental microbiology, 2008, 74(1): 200-207.
Kakikawa et al. (2008)	Dunhuang, China	Bacteria and Fungi	Kakikawa M, Kobayashi F, Maki T, et al. Dustborne microorganisms in the atmosphere over an Asian dust source region, Dunhuang[J]. Air Quality, Atmosphere & Health, 2008, 1(4): 195-202.
Maki et al. (2008)	Dunhuang, China	Bacteria	Maki T, Susuki S, Kobayashi F, et al. Phylogenetic diversity and vertical distribution of a halobacterial community in the atmosphere of an Asian dust (KOSA) source region, Dunhuang City[J]. Air Quality, Atmosphere & Health, 2008, 1(2): 81-89.
Polymenakou et al. (2008)	Crete	Bacteria	Polymenakou P N, Mandalakis M, Stephanou E G, et al. Particle size distribution of airborne microorganisms and pathogens during an intense African dust event in the eastern Mediterranean[J]. Environmental Health Perspectives, 2008, 116(3): 292.
Hervàs et al. (2009)	Spain	Bacteria	Hervàs A, Camarero L, Reche I, et al. Viability and potential for immigration of airborne bacteria from Africa that reach high mountain lakes in Europe[J]. Environmental Microbiology, 2009, 11(6): 1612-1623.
Lee et al. (2009)	Korea	Bacteria	Lee S, Choi B, Yi S M, et al. Characterization of microbial community during Asian dust events in Korea[J]. Science of the total environment, 2009, 407(20): 5308-5314.
Lim et al. (2009)	Australia	Bacteria and Fungi	Lim N, Munday C I, Allison G E, et al. Microbiological and meteorological analysis of two Australian dust storms in April 2009[J]. Science of the Total Environment, 2011, 412: 223-231.
Waisel et al. (2009)	Israel&Turkey	Pollen and spores	Waisel Y, Ganor E, Epshtein V, et al. Airborne pollen, spores, and dust across the East Mediterranean Sea[J]. Aerobiologia, 2008, 24(3): 125-131.
Thomson et al. (2009)	West Africa	Bacteria	Thomson M C, Jeanne I, Djingarey M. Dust and epidemic meningitis in the Sahel: a public health and operational research perspective[C]//IOP conference series: Earth and environmental science. IOP Publishing, 2009, 7(1): 012017.
Chen et al. (2010)	Taiwan	Virus	Chen P S, Tsai F T, Lin C K, et al. Ambient influenza and avian influenza virus during dust storm days and background days[J]. Environmental health perspectives, 2010, 118(9): 1211-1216.
Kenzaka et al.（2010）	China	Bacteria	Kenzaka T, Sueyoshi A, Baba T, et al. Soil microbial community structure in an Asian dust source region (loess plateau)[J]. Microbes and environments, 2010, 25(1): 53-57.
Maki et al. (2010)	Suzhou, China	Bacteria	Maki T, Susuki S, Kobayashi F, et al. Phylogenetic analysis of atmospheric halotolerant bacterial communities at high altitude in an Asian dust (KOSA) arrival region, Suzu City[J]. Science of the total environment, 2010, 408(20): 4556-4562.
Nishimura et al. (2010)	Japan	Bacteria	Nishimura Y, Kenzaka T, Sueyoshi A, et al. Similarity of bacterial community structure between Asian dust and its sources determined by rRNA gene-targeted approaches[J]. Microbes and environments, 2010, 25(1): 22-27.
Perfumo and Marchant (2010)	Turkey&Greece	Bacteria	Perfumo A, Marchant R. Global transport of thermophilic bacteria in atmospheric dust[J]. Environmental microbiology reports, 2010, 2(2): 333-339.
Jeon et al. (2011)	Korea	Bacteria	Jeon E M, Kim H J, Jung K, et al. Impact of Asian dust events on airborne bacterial community assessed by molecular analyses[J]. Atmospheric Environment, 2011, 45(25): 4313-4321.
Leski et al. (2011)	Kuwait&Iraq	Bacteria	Leski T A, Malanoski A P, Gregory M J, et al. Application of broad-range resequencing array RPM-TEI for detection of pathogens in desert dust samples from Kuwait and Iraq[J]. Applied and environmental microbiology, 2011: AEM. 00021-11.
Palmero et al. (2011)	Spain	Fungi	Palmero D, Rodriguez J M, De Cara M, et al. Fungal microbiota from rain water and pathogenicity of Fusarium species isolated from atmospheric dust and rainfall dust[J]. Journal of industrial microbiology & biotechnology, 2011, 38(1): 13-20.
Rahoma (2011)	Libyan	Bacteria and Fungi	Rahoma U A. Estimation of Pathogenic Microorganisms during Atmospheric Tempestat North Africa[J]. American Medical Journal, 2011, 2(1): 1.
Watanabe et al. (2011)	Japan	Pollen and spores	Watanabe M, Igishi T, Burioka N, et al. Pollen augments the influence of desert dust on symptoms of adult asthma patients[J]. Allergology International, 2011, 60(4): 517.
Chao et al. (2012)	Taiwan	Fungi	Chao H J, Chan C C, Rao C Y, et al. The effects of transported Asian dust on the composition and concentration of ambient fungi in Taiwan[J]. International journal of biometeorology, 2012, 56(2): 211-219.
Grishkan et al. (2012)	Israel	Fungi	Grishkan I, Schlesinger P, Mamane Y. Influence of dust storms on concentration and content of fungi in the atmosphere of Haifa, Israel[J]. Aerobiologia, 2012, 28(4): 557-564.
Metcalf et al. (2012)	Qatar	Bacteria	Metcalf J S, Richer R, Cox P A, et al. Cyanotoxins in desert environments may present a risk to human health[J]. Science of the Total Environment, 2012, 421: 118-123.
Hara et al. (2012)	Japan	Bacteria	Hara K, Zhang D. Bacterial abundance and viability in long-range transported dust[J]. Atmospheric Environment, 2012, 47: 20-25.
Yamaguchi et al. (2012)	Japan	Bacteria	Yamaguchi N, Ichijo T, Sakotani A, et al. Global dispersion of bacterial cells on Asian dust[J]. Scientific reports, 2012, 2.
Jeon et al. (2013)	Korea	Fungi	Jeon E M, Kim Y P, Jeong K, et al. Impacts of Asian dust events on atmospheric fungal communities[J]. Atmospheric Environment, 2013, 81: 39-50.
Gonzalez-Martin et al. (2013)	Globe	Bacteria and Virus	Gonzalez-Martin C, Teigell-Perez N, Lyles M, et al. Epifluorescent direct counts of bacteria and viruses from topsoil of various desert dust storm regions[J]. Research in microbiology, 2013, 164(1): 17-21.
Maki et al. (2013a)	Japan	Bacteria	Maki T, Kakikawa M, Kobayashi F, et al. Assessment of composition and origin of airborne bacteria in the free troposphere over Japan[J]. Atmospheric Environment, 2013, 74: 73-82.
Maki et al. (2013b)	Japan	Bacteria	Maki T, Kobayashi F, Yamada M, et al. NaCl-amendment assay targeting airborne bacteria in tropospheric bioaerosols transported by westerly wind over Noto Peninsula[J]. Aerobiologia, 2013, 29(3): 341-354.
Najafi et al. (2013)	Iran	Bacteria and Fungi	Najafi M S, Khoshakhllagh F, Zamanzadeh S M, et al. Characteristics of TSP loads during the Middle East springtime dust storm (MESDS) in Western Iran[J]. Arabian Journal of Geosciences, 2013: 1-15.
Ogawa et al. (2013)	Japan	Fungi	Ogawa H, Fujimura M, Satoh K, et al. Is bjerkandera allergy affected by the arrival of yellow sand dust?[J]. Allergology International, 2013, 62: 517-518.
Sanchez et al. (2013)	Spain	Bacteria	Sanchez de la Campa A, García-Salamanca A, Solano J, et al. Chemical and microbiological characterization of atmospheric particulate matter during an Intense African dust event in Southern Spain[J]. Environmental science & technology, 2013, 47(8): 3630-3638.
Bottos et al. (2014)	Antarctica	Bacteria	Bottos E M, Woo A C, Zawar-Reza P, et al. Airborne Bacterial populations above desert soils of the McMurdo Dry Valleys, Antarctica[J]. Microbial ecology, 2014, 67(1): 120-128.
Hallegraeff et al. (2014)	Australia	Fungi	Hallegraeff G, Coman F, Davies C, et al. Australian dust storm associated with extensive Aspergillus sydowii fungal “bloom” in coastal waters[J]. Applied and environmental microbiology, 2014, 80(11): 3315-3320.
Katra et al. (2014)	Israel	Bacteria and Fungi	Katra I, Arotsker L, Krasnov H, et al. Richness and Diversity in Dust Stormborne Biomes at the Southeast Mediterranean[J]. Scientific reports, 2014, 4.
Maki et al. (2014)	Japan	Bacteria	Maki T, Puspitasari F, Hara K, et al. Variations in the structure of airborne bacterial communities in a downwind area during an Asian dust (Kosa) event[J]. Science of The Total Environment, 2014, 488: 75-84.
Yamaguchi et al. (2014a)	Japan Sea	Bacteria	Yamaguchi N, Ichijo T, Baba T, et al. Long-range Transportation of Bacterial Cells by Asian Dust[J]. Genes and Environment, 2014.
Yamaguchi et al. (2014b)	Japan	Bacteria	Yamaguchi N, Park J, Kodama M, et al. Changes in the Airborne Bacterial Community in Outdoor Environments following Asian Dust Events[J]. Microbes and Environments, 2014, 29(1): 82-88.
Hara et al. (2014)	Japan	Bacteria	Hara K, Zhang D, Matsusaki H, et al. UV-Tolerant Culturable Bacteria in an Asian Dust Plume Transported over the East China Sea[J].
